# Supplementary material
Source: publisher site journal article supplement (https://static.cambridge.org/content/id/urn:cambridge.org:id:article:S1368980020001743/resource/name/S1368980020001743supp002.docx)
Supplement: Supplementary file 1 [file S1368980020001743supp002.docx]

Coding Structure Table

| Theme | Category | Codes |
| --- | --- | --- |
| Access  * Accessing the Internet primarily through smartphones | Personal Mobile Access | Smartphone |
| Tablet |
| Shared/Public Access | Family members device |
| Public Library |
| Wifi at public space |
| Internet Access | Wifi at public space |
| Wifi at home |
| Ethernet cable at home |
| Personal Non-Mobile Access | Desktop at home |
| Laptop at home |
| Computer at work |
| Connectivity | Wifi / ubiquitous |
| Connection challenging at home |
| Current Internet Use  * Using the Internet for many purposes including searching for health-related information | Health | “Google” health and medical questions |
| Telehealth with provider |
| Trackers (diet/activity) |
| Communicate | Calendar/appointments |
| Social Media |
| Texting |
| Entertainment | Games |
| Videos |
| Opportunities  * Possible opportunities for online diabetes nutrition education | Online support from “real people” | Videochat with health care provider |
| Texting with health care provider |
| Text-support with other people who have diabetes |
| Dietitian reviews food tracker |
| Social media group with other people who have diabetes |
| Resources | Trustworthy websites |
| Recipes for diabetes |
| Cooking tips or cooking videos “how to” |
